# Supplementary material
Source: MDPI journal article supplement (https://www.mdpi.com/2076-3298/10/12/211)
Supplement: s1 [file s1]

# Supplementary Material

## Monitoring of Coastal Dunes and Lagoons: Important Ecosystems to Safeguard

Carmine Massarelli<sup>1\*</sup>, Claudia Campanale<sup>1</sup>, Vito Felice Uricchio<sup>1</sup>

<sup>1</sup> Affiliation 1; [claudia.campanale@ba.irsacnr.it](mailto:claudia.campanale@ba.irsacnr.it); [vito.uricchio@ba.irsacnr.it](mailto:vito.uricchio@ba.irsacnr.it)

\* Correspondence: [carmine.massarelli@ba.irsacnr.it](mailto:carmine.massarelli@ba.irsacnr.it) - Water Research Institute, Italian National Research Council (IRSA-CNR), 70132 Bari, Italy

Table S1. Collected data with all the useful information

| Relief number              | 1   | 2   | 3   | 4   | 5   |  |  |  |  |
|----------------------------|-----|-----|-----|-----|-----|--|--|--|--|
| altitude (m.)              | 5   | 5   | 5   | 5   | 5   |  |  |  |  |
| slope (°)                  | 30  | 20  | 0   | 0   | 0   |  |  |  |  |
| cover (%) TOT              | 90  | 80  | 90  | 90  | 80  |  |  |  |  |
| tree layer cover           | -   | -   | 80  | 10  | 10  |  |  |  |  |
| shrub layer cover          | 20  | 50  | 15  | 80  | 70  |  |  |  |  |
| herbaceous layer cover     | 70  | 30  | 5   | 10  | 20  |  |  |  |  |
| tree layer height          | -   | -   | 500 | 300 | 300 |  |  |  |  |
| shrub layer height         | 100 | 200 | 200 | 200 | 150 |  |  |  |  |
| height of herbaceous layer | 70  | 50  | 30  | 40  | 20  |  |  |  |  |
| relief area (m2)           | 200 | 200 | 150 | 150 | 150 |  |  |  |  |

  

| List of species                                                                         |   |   |   |   |   | Family          | Biological form | Chorological type | Protection                             |
|-----------------------------------------------------------------------------------------|---|---|---|---|---|-----------------|-----------------|-------------------|----------------------------------------|
| Achillea maritima (L.) Ehrend. & Y.P. Guo                                               | + | + |   | 2 |   | Asteraceae      | Ch suffr        | Medit-Atl(Euri-)  | Molise                                 |
| Calamagrostis arenaria (L.) Roth subsp. arundinacea (Husn.) Banfi, Galasso & Bartolucci | 2 | 1 |   | 3 |   | Poaceae         | G rhiz          | Euri-Medit        | -                                      |
| Anisantha madritensis (L.) Nevski subsp. madritensis                                    | + | + |   |   |   | Poaceae         | T scap          | Euri-Medit        | -                                      |
| Asparagus acutifolius L.                                                                |   |   | + |   |   | Asparagaceae    | G rhiz          | Steno-Medit       | Trentino Alto Agide                    |
| Brachypodium retusum (Pers.) P. Beauv.                                                  |   |   | + | + | 1 | Poaceae         | H caesp         | Steno-Medit-Occid | -                                      |
| Cakile maritima Scop. subsp. maritima                                                   |   | + |   | + |   | Brassicaceae    | T scap          | Medit-Atl(Steno-) | -                                      |
| Cytisus infestus (C.Presl) Guss.                                                        |   | + | + |   |   | Fabaceae        | P caesp         | Steno-Medit       | -                                      |
| Calystegia soldanella L.                                                                | + | + |   | + | + | Convolvulaceae  | G rhiz          | Cosmop            | -                                      |
| Chenopodium album L.                                                                    |   |   |   | + |   | Amaranthaceae   | T scap          | Cosmop            | -                                      |
| Cistus monspeliensis L.                                                                 |   |   | + |   | 2 | Cistaceae       | NP              | Steno-Medit       | -                                      |
| Cistus salviifolius L.                                                                  |   |   | + |   | 1 | Cistaceae       | NP              | Steno-Medit       | -                                      |
| Convolvulus soldanella L.                                                               | + | + |   |   |   | Convolvulaceae  | G rhiz          | Cosmop            | Basilicata                             |
| Corynephorus divaricatus (Pourr.) Breistr.                                              | + | + |   |   |   | Poaceae         | T scap          | Steno-Medit-Occid | -                                      |
| Crithmum maritimum L.                                                                   |   |   | + | + |   | Apiaceae        | Ch suffr        | Euri-Medit        | Molise                                 |
| Cutandia maritima (L.) Benth. ex Barbey                                                 | 1 | + |   |   |   | Poaceae         | T scap          | Steno-Medit       | -                                      |
| Cytisus spinosus (L.) Lam.                                                              |   |   | + |   |   | Fabaceae        | P caesp         | Steno-Medit       | -                                      |
| Daucus carota L.                                                                        |   |   | + |   | 1 | Apiaceae        | H bienn         | Paleotemp         | -                                      |
| Daucus pumilus (L.) Hoffmanns. & Link                                                   | + | + |   |   |   | Apiaceae        | T scap          | Steno-Medit       | -                                      |
| Deschampsia cespitosa (L.) P. Beauv.                                                    |   |   | 1 |   | 1 | Poaceae         | H caesp         | Subcosmop         | -                                      |
| Echinophora spinosa L.                                                                  | 1 | + |   | + |   | Apiaceae        | H scap          | Euri-Medit        | Molise                                 |
| Eryngium maritimum L.                                                                   | + | + |   | 1 |   | Apiaceae        | G rhiz          | Medit-Atl(Euri-)  | -                                      |
| Euphorbia paralias L.                                                                   | + | 1 |   | + |   | Euphorbiaceae   | Ch suffr        | Atl               | Molise                                 |
| Frankenia hirsuta L.                                                                    |   |   |   |   | + | Frankeniaceae   | Ch suffr        | Steno-Medit       | -                                      |
| Hedypnois rhagadioloides (L.) F.W. Schmidt                                              | + |   |   |   |   | Asteraceae      | T scap          | Steno-Medit       | -                                      |
| Hordeum secalinum Schreb.                                                               | + | + |   |   |   | Poaceae         | H caesp         | Euri-Medit-Occid  | -                                      |
| Juniperus macrocarpa Sm.                                                                | 3 | 2 | 2 | 1 | 1 | Cupressaceae    | P caesp         | Euri-Medit        | -                                      |
| Juniperus turbinata Guss.                                                               |   |   | 4 | 3 | 1 | Cupressaceae    | P caesp         | W-Medit           | -                                      |
| Lagurus ovatus L. s.l.                                                                  | 1 | + | + |   |   | Poaceae         | T scap          | Euri-Medit        | -                                      |
| Limbarda crithmoides (L.) Dumort.                                                       |   | 1 |   | 2 | 1 | Asteraceae      | Ch suffr        | Medit-Atl(Steno-) | -                                      |
| Loniceria implexa Aiton subsp. implexa                                                  |   |   | + |   |   | Caprifoliaceae  | P lian          | Steno-Medit       | -                                      |
| Lotus creticus L.                                                                       | 2 | 1 |   |   | 1 | Fabaceae        | Ch suffr        | Steno-Medit       | -                                      |
| Matthiola sinuata (L.) W.T.Aiton                                                        | 1 | 1 |   | + |   | Brassicaceae    | H bienn         | Medit-Atl(Euri-)  | -                                      |
| Medicago littoralis Rohde ex Loisel.                                                    | + | + |   |   |   | Fabaceae        | T scap          | Euri-Medit        | -                                      |
| Myrtus communis L.                                                                      |   |   | 2 | 2 | 1 | Myrtaceae       | P caesp         | Steno-Medit       | Abruzzo and Molise                     |
| Oloptum miliaceum (L.) Röser & H.R.Hamasha                                              |   | + | + | + | 1 | Poaceae         | H caesp         | Medit-Turan       | -                                      |
| Osyris alba L.                                                                          |   |   | + |   |   | Santalaceae     | NP              | Euri-Medit        | -                                      |
| Pancratium maritimum L.                                                                 | 1 | 1 |   |   |   | Amariyllidaceae | G bulb          | Steno-Medit       | Lazio, Molise, Basilicata and Calabria |
| Phillyrea latifolia L.                                                                  | 1 | 1 | 2 | 1 | 2 | Oleaceae        | P caesp         | Steno-Medit       | Veneto                                 |
| Pistacia lentiscus L.                                                                   | 3 | 2 | 1 | 2 | 2 | Anacardiaceae   | P caesp         | S-Medit           | Umbria and Molise                      |
| Pittosporum tobira (Thunb.) W.T. Aiton                                                  |   |   |   |   | + | Pittosporaceae  | NP              | E-Asiat           | -                                      |
| Plantago albicans L.                                                                    |   | + |   |   |   | Plantaginaceae  | Ch suffr        | S-Medit           | -                                      |
| Plantago lagopus L.                                                                     | + | + |   |   |   | Plantaginaceae  | T scap          | Steno-Medit       | -                                      |
| Stachys major (L.) Bartolucci & Peruzzi                                                 | + | + |   |   |   | Lamiaceae       | Ch frut         | Steno-Medit       | -                                      |
| Reichardia picroides (L.) Roth                                                          | 1 | + | + | + | + | Asteraceae      | H scap          | Steno-Medit       | -                                      |
| Rhagadiolus stellatus (L.) Gaertn.                                                      |   | + |   |   |   | Asteraceae      | T scap          | Euri-Medit        | -                                      |
| Rhamnus alaternus L. subsp. alaternus                                                   | 1 | 1 | 2 | 1 | 1 | Rhamnaceae      | P caesp         | Steno-Medit       | -                                      |
| Romulea rollei Parl.                                                                    | + | + |   |   |   | Iridaceae       | G bulb          | Steno-Medit-Occid | Molise                                 |
| Rubia peregrina L.                                                                      | + | 1 | 1 |   | + | Rubiaceae       | P lian          | Steno-Medit       | -                                      |
| Sabal palmetto (Walter) Lodd. ex Schult. & Schult.f.                                    |   |   | + |   |   | Arecaceae       | P scap          | Cosmop            | -                                      |
| Silene colorata Poir.                                                                   | 1 | + |   |   |   | Caryophyllaceae | T scap          | Steno-Medit       | -                                      |
| Silene nicaeensis All.                                                                  | + |   |   |   |   | Caryophyllaceae | T scap          | Steno-Medit       | -                                      |
| Silene vulgaris (Moench) Garcke                                                         |   |   | + |   | 1 | Caryophyllaceae | H scap          | Paleotemp         | Friuli Venezia Giulia                  |
| Sixalix atropurpurea (L.) Greuter & Burdet                                              | + |   |   |   |   | Dipsacaceae     | H bienn         | Steno-Medit       | -                                      |
| Smilax aspera L.                                                                        | + | 1 | 3 | 2 | 2 | Smilacaceae     | G rhiz          | Subtrop           | -                                      |
| Sonchus tenerimus L.                                                                    | + | + |   |   |   | Asteraceae      | H scap          | Steno-Medit       | -                                      |
| Sporobolus virginicus (L.) Kunth                                                        | 2 | 1 | + | + |   | Poaceae         | G rhiz          | Subtrop           | Molise                                 |
| Thinopyrum junceum (L.) Å. Löve                                                         | 2 | 2 | + | + | 2 | Poaceae         | G rhiz          | Euri-Medit        | -                                      |
| Thymra capitata (L.) Cav.                                                               |   |   | 1 |   | 2 | Lamiaceae       | Ch frut         | Steno-Medit       | -                                      |
| Viburnum tinus L.                                                                       |   |   | + |   |   | Viburnaceae     | P caesp         | Steno-Medit       | -                                      |
| Vulpia fasciculata Forssk.                                                              | 2 | 2 |   |   |   | Poaceae         | T caesp         | Medit-Atl(Euri-)  | -                                      |
